# Supplementary material for: Early metastasis detected in patients with multifocal pulmonary ground-glass opacities (GGOs)
Source: PubMed Central journal article supplement — Thorax. 2017 Oct 22;73(3):290–2. doi: 10.1136/thoraxjnl-2017-210169 (PMC5870446; doi:10.1136/thoraxjnl-2017-210169), 2017-10-22
Supplement: thoraxjnl-2017-210169supp001.pdf [file thoraxjnl-2017-210169supp001.pdf]

## Supplementary data

### Methods

**Clinical samples:** Multiple intrapulmonary lesions and adjacent normal tissues or matched blood samples were collected from 2 patients with multifocal GGOs and subjected to whole-exome sequencing. These patients received surgical resection at Peking University People's Hospital (Beijing, China). Informed consent was obtained from patients involved. This study was approved by the institutional review board (IRB) of both Peking University People's Hospital and Peking University. Formalin-fixed, paraffin-embedded specimens underwent gross pathologic examination by experienced pathologists to estimate the clinicopathological subtypes and disease stages. High molecular weight genomic DNA was extracted from multiple tumor specimens and normal specimens

**Laser capture microdissection (LCM):** Multiple lesions were cut into 10-15 consecutive tissue slides with 10um in thickness. Two experienced histologists independently confirmed the tumor areas. Then these samples were isolated by laser-capture microdissection using Leica LMD7000 Microsystem (Wetzlar, Germany). Genomic DNA extraction was performed with the QIAamp DNA Micro Kit (Qiagen, Germany) according to the manufacturer's protocol.

**Whole exome library preparation and sequencing:** The exome of each sample was captured with SureSelect All Exon V5 kit (Agilent Technologies) according to the manufacturer's protocol. Briefly, 200ng-500ng genomic DNA was extracted and fragmented into pieces around 250bp using the Covaris ultrasonic system (Covaris). Purification was conducted using Agencourt AMPure XP SPRI beads (Beckman Coulter) and DNA fragment size was assessed using Fragment Analyzer™ platform (Advanced Analytical Technologies, Inc). The fragmented DNA was blunted with 5'-phosphorylated ends using the NEB Quick Blunting Kit and ligated to truncated PE P7 adaptors, followed by barcoded P5 adaptors using NEBNext Quick Ligation Module. After washing by Agencourt AMPure XP SPRI beads and nick fill-in with Bst polymerase Large Fragment (New England Biolabs), the DNA fragments equipped with adaptors (libraries) were enriched by PCR. Amplified library was further purified and quality checked. Afterwards, four barcoded libraries were pooled to achieve a total amount of 500 ng of DNA, which was used for hybridization and posthybridization amplification. The posthybridization amplification product was quality checked and sequenced with Illumina HiSeq™ 2500 and 4000(Illumina, San Diego), generating  $2 \times 100\text{bp}$ ,  $2 \times 125\text{bp}$  and  $2 \times 150\text{bp}$  paired-end (PE) reads.

**Exome Sequencing data analysis for SNVs and INDELS calling:** Paired-end reads were aligned to human genome hg19 (UCSC) using the Burrows–Wheeler Aligner with default parameters (1) . The aligned BAM files of each library were then sorted and merged using Samtools 0.1.19 (2). For the further SNVs and INDELS calling, aligned reads were realigned to genome with the Genome Analysis Toolkit (GATK 2.1–8) (3) based on dbSNP 135 ([www.ncbi.nlm.nih.gov/projects/SNP/](http://www.ncbi.nlm.nih.gov/projects/SNP/)). Then, the Picard-tools 1.76 was applied to fixing mate pairs and marking duplicates (<http://Picard.Sourceforge.net>). Afterwards, the base quality recalibration was done with GATK. The somatic variants including SNVs and INDELS was called using GATK Unified Genotyper in multi-sample mode following the functional effect annotation of these somatic variants using

SNPEFF 3.0 (4). A series of filtering criteria were set to filter the variant candidates and finally identify the SNVs and INDELS: 1) At least 10X coverage was required in the normal sample of each patient bearing at most 1X mutation coverage; 2) At least 10X total coverage was required in tumor samples in which over 3X mutation coverage was required; 3) Reads with Phred quality below 20 at each variant position were excluded; 4) Variations that listed in dbSNP 135 were removed unless they also documented by the Catalog of Somatic Mutations in Cancer (COSMIC) database; 5) Variations that listed in the National Heart, Lung, and Blood Institute Exome Sequencing Project were removed; 6) Because each mutation detected by GATK was presented in multiple-sample mode, at least 8% of mutated reads presented in at least one tumor sample in each patient were required to support the mutation. All the mutations passed the filtering were manually reviewed using “Samtools tview” to further eliminate the mutations that present in poorly mapped reads.

**Mutation Spectrum and Statistical analysis:** Mutational signature of P1 was profiled by considering the somatic mutations detected in all the lesions in P1. P2 was not involved in this analysis due to the small total number of mutations. Somatic mutations were firstly categorized into 6 mutational subtypes, including C:G>A:T, C:G>G:C, C:G>T:A, T:A>A:T, T:A>G:C and T:A>C:G. To capture the underlying genomic imprints during the mutagenesis, for each mutation, the mutation context defined as the mutated base and its 5' and 3' flanking bases within a trinucleotides sequence motif was investigated. Transcriptional strand bias of certain mutation subtype was studied by considering the transcriptional direction of mutated genes. A binomial test was used to examine the statistical significance of transcriptional strand bias.

## Reference

1. Li H, and Durbin R. Fast and accurate short read alignment with Burrows-Wheeler transform. *Bioinformatics*. 2009;25(14):1754-60.
2. Li H, Handsaker B, Wysoker A, Fennell T, Ruan J, Homer N, Marth G, Abecasis G, Durbin R, and Genome Project Data Processing S. The Sequence Alignment/Map format and SAMtools. *Bioinformatics*. 2009;25(16):2078-9.
3. McKenna A, Hanna M, Banks E, Sivachenko A, Cibulskis K, Kernytsky A, Garimella K, Altshuler D, Gabriel S, Daly M, et al. The Genome Analysis Toolkit: a MapReduce framework for analyzing next-generation DNA sequencing data. *Genome research*. 2010;20(9):1297-303.
4. Cingolani P, Platts A, Wang le L, Coon M, Nguyen T, Wang L, Land SJ, Lu X, and Ruden DM. A program for annotating and predicting the effects of single nucleotide polymorphisms, SnpEff: SNPs in the genome of *Drosophila melanogaster* strain w1118; iso-2; iso-3. *Fly*. 2012;6(2):80-92.

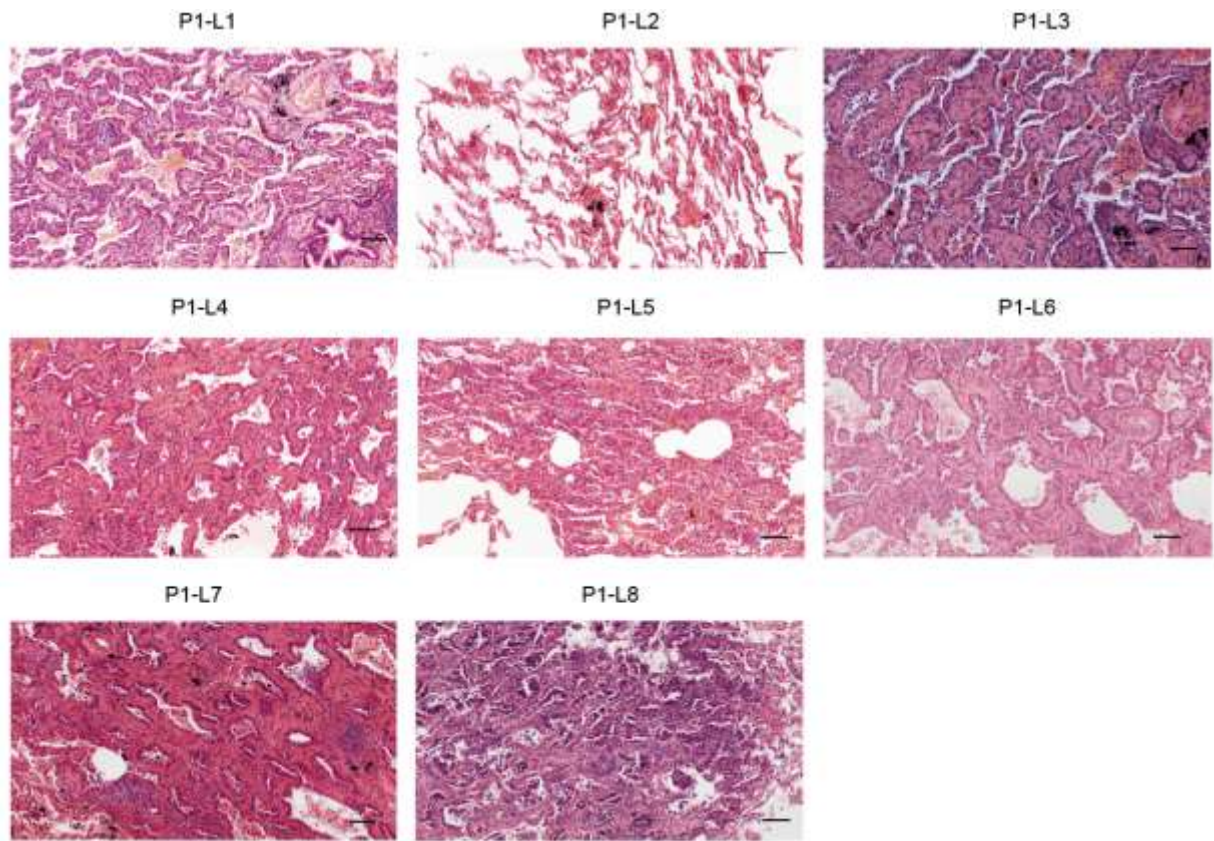

**Supplementary Figure 1:** H&E image of lesions in P1. Lesion names are in the form of 'Patient ID + lesion number'. For example, P1-L8 represents the no.8 lesion of patient 1. Scale bar : 100  $\mu$  m.

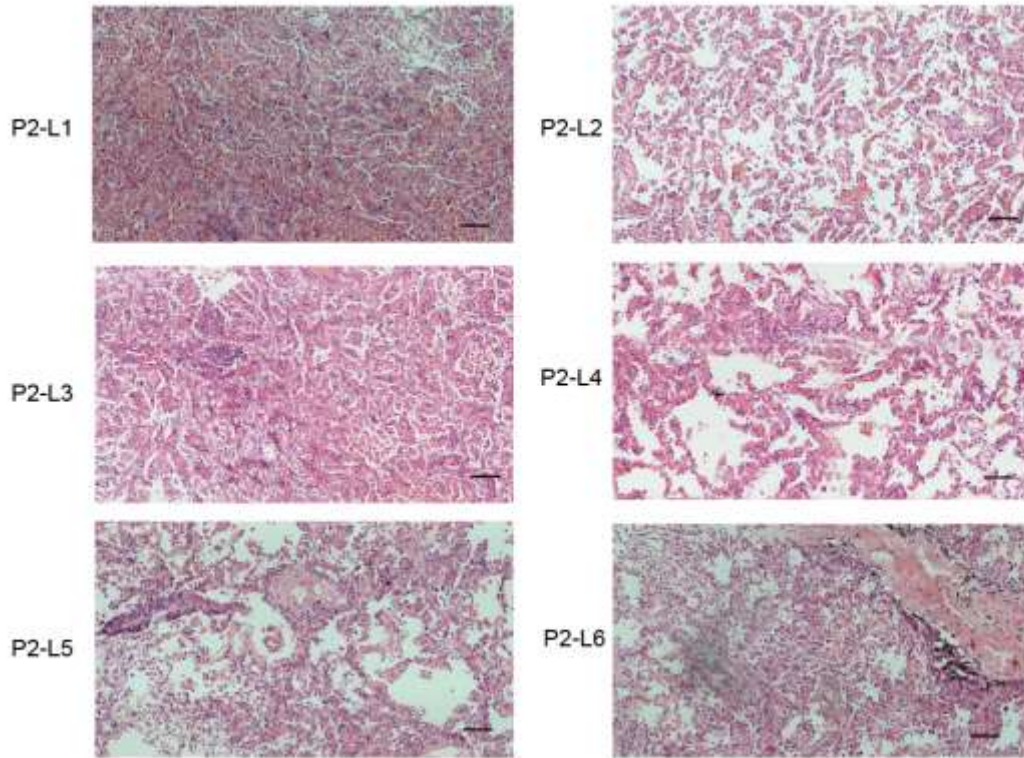

**Supplementary Figure 2:** H&E image of lesions in P2. Lesion names are in the form of 'Patient ID + lesion number'. For example, P2-L2 represents the no.2 lesion of patient 2. Scale bar : 100  $\mu$  m.

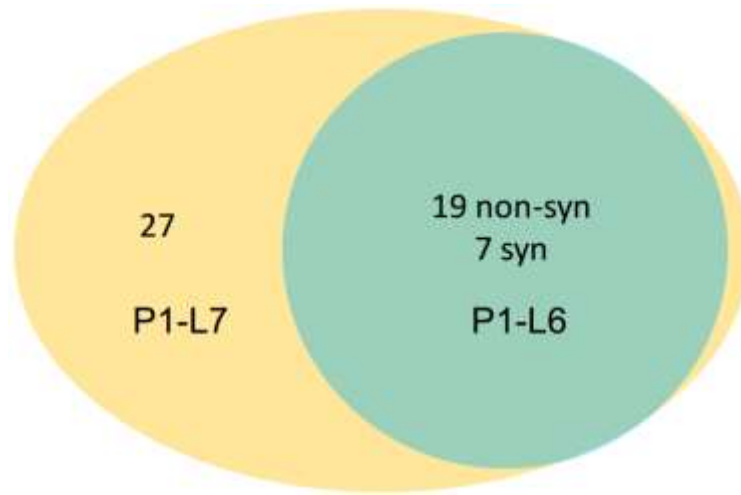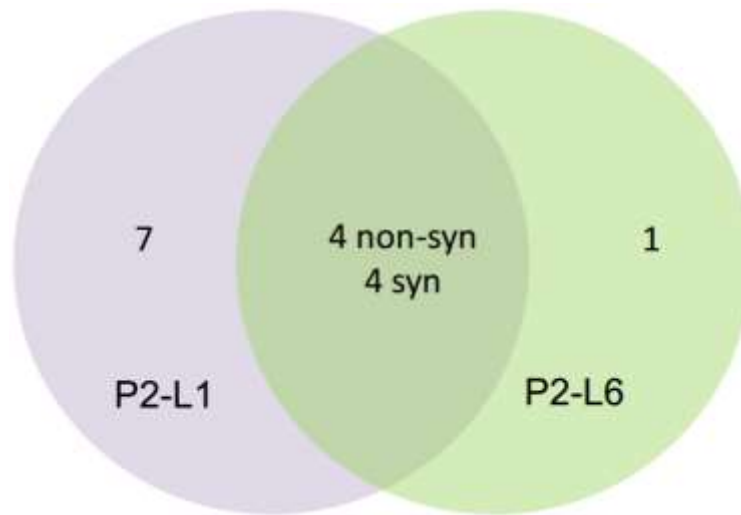

**Supplementary Figure 3:** The venn diagrams show the overlapped mutation number (including both synonymous and non-synonymous mutations) of the metastatic lesions in the two patients. Syn: synonymous mutations; Non-syn: non-synonymous mutations

**Supplementary Table 1: Sequencing information of samples**

| Samples | Average Sequencing Depth<br>(after removing duplicates) | % of Target Covered with<br>at least 10x | % of Target Covered with<br>at least 20x |
|---------|---------------------------------------------------------|------------------------------------------|------------------------------------------|
| P1-N    | 64x                                                     | 90.4%                                    | 79.6%                                    |
| P1-L1   | 68x                                                     | 96.0%                                    | 90.4%                                    |
| P1-L2   | 49x                                                     | 91.7%                                    | 82.8%                                    |
| P1-L3   | 71x                                                     | 92.6%                                    | 85.5%                                    |
| P1-L4   | 91x                                                     | 91.7%                                    | 91.3%                                    |
| P1-L5   | 38x                                                     | 89.8%                                    | 77.1%                                    |
| P1-L6   | 40x                                                     | 90.7%                                    | 78.1%                                    |
| P1-L7   | 90x                                                     | 96.9%                                    | 92.2%                                    |
| P1-L8   | 69x                                                     | 93.6%                                    | 86.5%                                    |
| P1-NT   | 41x                                                     | 88.6%                                    | 74.6%                                    |
| P2-N    | 87x                                                     | 98.3%                                    | 95.1%                                    |
| P2-L1   | 68x                                                     | 97.2%                                    | 91.8%                                    |
| P2-L2   | 67x                                                     | 97.2%                                    | 91.6%                                    |
| P2-L3   | 94x                                                     | 98.1%                                    | 94.8%                                    |
| P2-L4   | 82x                                                     | 98.1%                                    | 94.5%                                    |
| P2-L5   | 70x                                                     | 97.3%                                    | 92.1%                                    |
| P2-L6   | 45x                                                     | 96.0%                                    | 86.5%                                    |
| P2-NT   | 101x                                                    | 99.0%                                    | 97.1%                                    |

**Supplementary Table 2: Summary of somatic mutations detected in the two patients.**

**Patient 1**

| Chr   | Postion   | Wild<br>type | Mutant | Type | Gene<br>name | Effect     | Amino Acid<br>Old/New | Condon<br>Old/New | Samples with mutation<br>(Sample ID:Total<br>Coverage/Mutant Coverage) | Samples with mutation<br>(Sample ID:Allele Frequency) |
|-------|-----------|--------------|--------|------|--------------|------------|-----------------------|-------------------|------------------------------------------------------------------------|-------------------------------------------------------|
| chrX  | 100744929 | G            | A      | SNP  | ARMCX4       | SYNONYMOUS | K/K                   | aaG/aaA           | P1-L5: 35/7                                                            | P1-L5: 0.2                                            |
| chrX  | 78426927  | C            | A      | SNP  | GPR174       | SYNONYMOUS | G/G                   | ggC/ggA           | P1-L7: 148/14                                                          | P1-L7: 0.09                                           |
| chr1  | 197641214 | T            | A      | SNP  | DENND1B      | SYNONYMOUS | G/G                   | ggA/ggT           | P1-L3: 163/25                                                          | P1-L3: 0.15                                           |
| chr1  | 40562809  | C            | A      | SNP  | PPT1         | SYNONYMOUS | P/P                   | ccG/ccT           | P1-L2: 114/24                                                          | P1-L2: 0.21                                           |
| chr1  | 6534094   | G            | A      | SNP  | PLEKHG5      | SYNONYMOUS | R/R                   | cgC/cgT           | P1-L3: 14/3                                                            | P1-L3: 0.21                                           |
| chr1  | 68151735  | G            | A      | SNP  | GADD45A      | SYNONYMOUS | E/E                   | gaG/gaA           | P1-L2: 114/24                                                          | P1-L2: 0.21                                           |
| chr1  | 7858687   | A            | G      | SNP  | PER3         | SYNONYMOUS | E/E                   | gaA/gaG           | P1-L6: 85/18 P1-L7: 174/19                                             | P1-L6: 0.21 P1-L7: 0.11                               |
| chr2  | 179642232 | G            | A      | SNP  | TTN          | SYNONYMOUS | A/A                   | gcC/gcT           | P1-L4: 79/11                                                           | P1-L4: 0.14                                           |
| chr2  | 192922440 | A            | G      | SNP  | TMEFF2       | SYNONYMOUS | F/F                   | ttT/ttC           | P1-L8: 128/14                                                          | P1-L8: 0.11                                           |
| chr2  | 49216145  | G            | A      | SNP  | FSHR         | SYNONYMOUS | F/F                   | ttC/ttT           | P1-L8: 60/9                                                            | P1-L8: 0.15                                           |
| chr3  | 38662462  | C            | T      | SNP  | SCN5A        | SYNONYMOUS | E/E                   | gaG/gaA           | P1-L4:55/9                                                             | P1-L4: 0.16                                           |
| chr4  | 998115    | C            | T      | SNP  | IDUA         | SYNONYMOUS | F/F                   | ttC/ttT           | P1-L3: 35/9                                                            | P1-L3: 0.26                                           |
| chr5  | 23526739  | G            | T      | SNP  | PRDM9        | SYNONYMOUS | V/V                   | gtG/gtT           | P1-L5:61/9                                                             | P1-L5 :0.15                                           |
| chr5  | 37303505  | T            | C      | SNP  | NUP155       | SYNONYMOUS | P/P                   | ccA/ccG           | P1-L3: 63/20                                                           | P1-L3: 0.32                                           |
| chr5  | 56161676  | A            | G      | SNP  | MAP3K1       | SYNONYMOUS | K/K                   | aaA/aaG           | P1-L7:133/15                                                           | P1-L7: 0.11                                           |
| chr6  | 143093662 | G            | T      | SNP  | HIVEP2       | SYNONYMOUS | V/V                   | gtC/gtA           | P1-L3: 58/13                                                           | P1-L3: 0.22                                           |
| chr6  | 158438282 | G            | T      | SNP  | SYNJ2        | SYNONYMOUS | T/T                   | acG/acT           | P1-L4: 117/14                                                          | P1-L4: 0.12                                           |
| chr7  | 120740067 | G            | T      | SNP  | C7orf58      | SYNONYMOUS | T/T                   | acG/acT           | P1-L4: 216/25                                                          | P1-L4: 0.12                                           |
| chr7  | 2686501   | G            | C      | SNP  | TTYH3        | SYNONYMOUS | L/L                   | ctG/ctC           | P1-L7: 116/17                                                          | P1-L7: 0.15                                           |
| chr7  | 44560419  | G            | A      | SNP  | NPC1L1       | SYNONYMOUS | G/G                   | ggC/ggT           | P1-L8: 69/20                                                           | P1-L8: 0.29                                           |
| chr7  | 56132037  | G            | A      | SNP  | SUMF2        | SYNONYMOUS | L/L                   | ctG/ctA           | P1-L6: 27/10 P1-7: 161/51                                              | P1-L6: 0.37 P1-7: 0.32                                |
| chr9  | 37006525  | C            | G      | SNP  | PAX5         | SYNONYMOUS | R/R                   | cgG/cgC           | P1-L7: 117/9                                                           | P1-L7: 0.08                                           |
| chr9  | 37919845  | G            | A      | SNP  | SHB          | SYNONYMOUS | L/L                   | ctC/ctT           | P1-L3: 14/4                                                            | P1-L3: 0.29                                           |
| chr9  | 96021347  | C            | A      | SNP  | WNK2         | SYNONYMOUS | I/I                   | atC/atA           | P1-L5: 58/10                                                           | P1-L5: 0.17                                           |
| chr11 | 64973183  | C            | T      | SNP  | CAPN1        | SYNONYMOUS | V/V                   | gtC/gtT           | P1-L1: 137/25                                                          | P1-L1: 0.18                                           |
| chr11 | 8704760   | G            | A      | SNP  | RPL27A       | SYNONYMOUS | L/L                   | ctG/ctA           | P1-L7: 204/25                                                          | P1-L7: 0.12                                           |
| chr12 | 29509350  | A            | G      | SNP  | ERGIC2       | SYNONYMOUS | N/N                   | aaT/aaC           | P1-L5: 71/10                                                           | P1-L5: 0.14                                           |
| chr12 | 49440568  | G            | C      | SNP  | MLL2         | SYNONYMOUS | T/T                   | acC/acG           | P1-L6: 67/13 P1-L7: 113/20                                             | P1-L6: 0.19 P1-L7: 0.18                               |
| chr12 | 65564235  | A            | C      | SNP  | LEMD3        | SYNONYMOUS | R/R                   | Aga/Cga           | P1-L2: 73/16                                                           | P1-L2: 0.22                                           |



|       |           |   |   |     |           |                   |     |         |                            |             |             |
|-------|-----------|---|---|-----|-----------|-------------------|-----|---------|----------------------------|-------------|-------------|
| chr14 | 50735938  | T | A | SNP | L2HGDH    | SYNONYMOUS        | G/G | ggA/ggT | P1-L4: 106/13              | P1-L4: 0.12 |             |
| chr14 | 64600864  | G | T | SNP | SYNE2     | SYNONYMOUS        | V/V | gtG/gtT | P1-L5: 52/8                | P1-L5: 0.15 |             |
| chr14 | 68249585  | C | T | SNP | ZFYVE26   | SYNONYMOUS        | R/R | cgG/cgA | P1-L6: 53/8 P1-L7:107/25   | P1-L6: 0.15 | P1-L7: 0.23 |
| chr14 | 77706895  | G | A | SNP | TMEM63C   | SYNONYMOUS        | P/P | ccG/ccA | P1-L1: 84/16               | P1-L1: 0.19 |             |
| chr14 | 79433734  | T | C | SNP | NRXN3     | SYNONYMOUS        | D/D | gaT/gaC | P1-L7: 80/13               | P1-L7: 0.16 |             |
| chr15 | 45427453  | C | T | SNP | DUOX1     | SYNONYMOUS        | P/P | ccC/ccT | P1-L3: 27/12               | P1-L3: 0.44 |             |
| chr15 | 57543552  | C | T | SNP | TCF12     | SYNONYMOUS        | T/T | acC/acT | P1-L2: 95/12               | P1-L2: 0.13 |             |
| chr15 | 81282070  | C | G | SNP | MESDC2    | SYNONYMOUS        | L/L | ctG/ctC | P1-L4: 62/9                | P1-L4: 0.15 |             |
| chr15 | 93534718  | T | G | SNP | CHD2      | SYNONYMOUS        | A/A | gcT/gcG | P1-L2: 38/10               | P1-L2: 0.26 |             |
| chr17 | 27613506  | G | A | SNP | NUFIP2    | SYNONYMOUS        | I/I | atC/atT | P1-L6: 50/13 P1-L7: 69/19  | P1-L6: 0.26 | P1-L7: 0.28 |
| chr17 | 31065331  | C | A | SNP | MYO1D     | SYNONYMOUS        | L/L | ctG/ctT | P1-L6: 65/8 P1-L7: 98/33   | P1-L6: 0.12 | P1-L7: 0.34 |
| chr18 | 6949151   | C | T | SNP | LAMA1     | SYNONYMOUS        | L/L | ttG/ttA | P1-L6: 53/12 P1-L7:106/20  | P1-L6: 0.23 | P1-L7:0.19  |
| chr18 | 6978202   | G | A | SNP | LAMA1     | SYNONYMOUS        | T/T | acC/acT | P1-L1: 62/14               | P1-L1: 0.23 |             |
| chr19 | 51022094  | C | A | SNP | LRRC4B    | SYNONYMOUS        | L/L | ctG/ctT | P1-L1: 115/27              | P1-L1: 0.23 |             |
| chr20 | 32258549  | C | A | SNP | NECAB3    | SYNONYMOUS        | G/G | ggG/ggT | P1-L1: 37/8                | P1-L1: 0.22 |             |
| chr21 | 31812660  | C | T | SNP | KRTAP15-1 | SYNONYMOUS        | C/C | tgC/tgT | P1-L1: 109/26              | P1-L1: 0.24 |             |
| chr21 | 41450689  | G | A | SNP | DSCAM     | SYNONYMOUS        | L/L | Ctg/Ttg | P1-L4: 135/18              | P1-L4: 0.13 |             |
| chr21 | 46888631  | C | T | SNP | COL18A1   | SYNONYMOUS        | G/G | ggC/ggT | P1-L8: 30/7                | P1-L8: 0.23 |             |
| chr22 | 21213404  | A | T | SNP | SNAP29    | SYNONYMOUS        | S/S | tcA/tcT | P1-L5: 38/9                | P1-L5: 0.24 |             |
| chrX  | 106171532 | T | C | SNP | CLDN2     | NON SYNONYMOUS    | M/T | aTg/aCg | P1-L7: 144/18              | P1-L7: 0.13 |             |
| chrX  | 129483320 | G | T | SNP | SLC25A14  | SPLICE SITE DONOR |     |         | P1-L1: 33/7                | P1-L1: 0.21 |             |
| chrX  | 154490371 | A | C | SNP | RAB39B    | NON_SYNONYMOUS    | L/R | cTg/cGg | P1-L7: 110/10              | P1-L7: 0.09 |             |
| chrX  | 47006898  | G | T | SNP | RBM10     | SPLICE SITE DONOR |     |         | P1-L8: 119/36              | P1-L8: 0.3  |             |
| chrX  | 47038831  | G | T | SNP | RBM10     | STOP GAINED       | G/* | Gga/Tga | P1-L4: 56/12               | P1-L4: 0.21 |             |
| chrX  | 49108142  | G | A | SNP | FOXP3     | NON SYNONYMOUS    | H/Y | Cat/Tat | P1-L6: 71/11 P1-L7: 275/57 | P1-L6: 0.15 | P1-L7: 0.21 |
| chrX  | 50090673  | G | A | SNP | CCNB3     | NON_SYNONYMOUS    | E/K | Gag/Aag | P1-L3: 102/10              | P1-L3: 0.1  |             |
| chrX  | 51638641  | C | G | SNP | MAGED1    | NON SYNONYMOUS    | P/A | Cct/Gct | P1-L3: 106/19              | P1-L3: 0.18 |             |
| chrX  | 69283152  | C | T | SNP | OTUD6A    | NON SYNONYMOUS    | R/C | Cgc/Tgc | P1-L1: 91/33               | P1-L1: 0.36 |             |
| chr1  | 119427994 | C | A | SNP | TBX15     | NON SYNONYMOUS    | Q/H | caG/caT | P1-L6: 28/8 P1-7: 95/23    | P1-L6: 0.29 | P1-7: 0.24  |
| chr1  | 156626884 | C | G | SNP | BCAN      | NON_SYNONYMOUS    | I/M | atC/atG | P1-L8: 87/24               | P1-L8: 0.28 |             |
| chr1  | 157666016 | C | T | SNP | FCRL3     | NON SYNONYMOUS    | G/R | Ggg/Agg | P1-L3: 80/12               | P1-L3: 0.15 |             |
| chr1  | 161993218 | C | A | SNP | OLFML2B   | START LOST        | M/I | atG/atT | P1-L1: 73/9                | P1-L1: 0.12 |             |
| chr1  | 167805652 | G | C | SNP | ADCY10    | NON_SYNONYMOUS    | I/M | atC/atG | P1-L2: 65/10               | P1-L2: 0.15 |             |
| chr1  | 186157104 | C | T | SNP | HMCN1     | NON SYNONYMOUS    | P/S | Ccc/Tcc | P1-L5: 97/15               | P1-L5: 0.15 |             |
| chr1  | 19181278  | C | T | SNP | TAS1R2    | NON SYNONYMOUS    | R/Q | cGg/cAg | P1-L8: 40/6                | P1-L8: 0.15 |             |
| chr1  | 203743270 | C | T | SNP | LAX1      | NON SYNONYMOUS    | P/S | Ccc/Tcc | P1-L8: 75/11               | P1-L8: 0.15 |             |

|      |           |   |   |     |          |                   |     |         |                              |                         |
|------|-----------|---|---|-----|----------|-------------------|-----|---------|------------------------------|-------------------------|
| chr1 | 228554512 | A | G | SNP | OBSCN    | NON_SYNONYMOUS    | D/G | gAc/gGc | P1-L8: 87/11                 | P1-L8: 0.13             |
| chr1 | 247769650 | A | G | SNP | OR2G3    | NON_SYNONYMOUS    | I/V | Ata/Gta | P1-L8: 108/12                | P1-L8: 0.11             |
| chr1 | 25555589  | T | A | SNP | SYF2     | NON_SYNONYMOUS    | Q/L | cAg/cTg | P1-L4: 153/18                | P1-L4: 0.12             |
| chr1 | 38197176  | G | C | SNP | EPHA10   | NON_SYNONYMOUS    | R/G | Cgc/Ggc | P1-L7: 98/21                 | P1-L7: 0.21             |
| chr1 | 91977192  | G | A | SNP | CDC7     | NON_SYNONYMOUS    | R/K | aGg/aAg | P1-L3: 174/75                | P1-L3: 0.43             |
| chr2 | 110372988 | T | A | SNP | SOWAHC   | NON_SYNONYMOUS    | W/R | Tgg/Agg | P1-L7: 179/23                | P1-L7: 0.13             |
| chr2 | 128747294 | T | A | SNP | SAP130   | NON_SYNONYMOUS    | T/S | Acc/Tcc | P1-L7: 124/14                | P1-L7: 0.11             |
| chr2 | 128855017 | A | T | SNP | UGGT1    | NON_SYNONYMOUS    | M/L | Atg/Ttg | P1-L8: 121/31                | P1-L8: 0.26             |
| chr2 | 131098558 | G | A | SNP | CCDC115  | NON_SYNONYMOUS    | A/V | gCc/gTc | P1-L7: 113/15                | P1-L7: 0.13             |
| chr2 | 175201983 | G | T | SNP | SP9      | NON_SYNONYMOUS    | K/N | aaG/aaT | P1-L3: 63/20                 | P1-L3: 0.32             |
| chr2 | 176964638 | G | A | SNP | HOXD12   | NON_SYNONYMOUS    | A/T | Gcc/Acc | P1-L6: 27/3 P1-L7: 117/39    | P1-L6: 0.11 P1-L7: 0.33 |
| chr2 | 179659244 | G | A | SNP | TTN      | NON_SYNONYMOUS    | A/V | gCg/gTg | P1-L8: 133/14                | P1-L8: 0.11             |
| chr2 | 185802563 | C | T | SNP | ZNF804A  | STOP_GAINED       | R/* | Cga/Tga | P1-L6: 99/19 P1-L7: 152/34   | P1-L6: 0.19 P1-L7: 0.22 |
| chr2 | 219603723 | G | T | SNP | TLL4     | NON_SYNONYMOUS    | D/Y | Gac/Tac | P1-L5: 45/8                  | P1-L5: 0.18             |
| chr2 | 236626273 | G | T | SNP | AGAP1    | STOP_GAINED       | E/* | Gag/Tag | P1-L4: 134/15                | P1-L4: 0.11             |
| chr2 | 24108668  | T | A | SNP | ATAD2B   | NON_SYNONYMOUS    | N/Y | Aac/Tac | P1-L5: 61/10                 | P1-L5: 0.16             |
| chr2 | 25611209  | G | A | SNP | DTNB     | NON_SYNONYMOUS    | H/Y | Cat/Tat | P1-L6: 34/4 P1-L7: 97/10     | P1-L6: 0.12 P1-L7: 0.1  |
| chr2 | 38178747  | G | T | SNP | FAM82A1  | NON_SYNONYMOUS    | R/L | cGt/cTt | P1-L4: 155/15                | P1-L4: 0.1              |
| chr2 | 51255218  | C | T | SNP | NRXN1    | NON_SYNONYMOUS    | G/D | gGc/gAc | P1-L4: 82/17                 | P1-L4: 0.21             |
| chr2 | 64322195  | C | A | SNP | PELI1    | NON_SYNONYMOUS    | V/L | Gta/Tta | P1-L8: 136/19                | P1-L8: 0.14             |
| chr2 | 69092942  | G | T | SNP | BMP10    | NON_SYNONYMOUS    | P/T | Ccc/Acc | P1-L4: 121/21                | P1-L4: 0.17             |
| chr2 | 85097447  | A | G | SNP | C2orf89  | NON_SYNONYMOUS    | F/L | Ttc/Ctc | P1-L2: 122/14                | P1-L2: 0.11             |
| chr3 | 105271027 | G | T | SNP | ALCAM    | SPLICE_SITE_DONOR |     |         | P1-L5: 49/9                  | P1-L5: 0.18             |
| chr3 | 10916721  | G | A | SNP | SLC6A11  | NON_SYNONYMOUS    | A/T | Gcc/Acc | P1-L3: 105/30                | P1-L3: 0.29             |
| chr3 | 127336140 | A | G | SNP | MCM2     | NON_SYNONYMOUS    | T/A | Acc/Gcc | P1-L7: 105/30                | P1-L7: 0.29             |
| chr3 | 135825114 | G | T | SNP | PPP2R3A  | NON_SYNONYMOUS    | E/D | gaG/gaT | P1-L1: 73/18                 | P1-L1: 0.25             |
| chr3 | 142272582 | G | A | SNP | ATR      | NON_SYNONYMOUS    | L/F | Ctt/Ttt | P1-L6: 29/6 P1-L7: 28/4      | P1-L6: 0.21 P1-L7: 0.14 |
| chr3 | 171379893 | T | C | SNP | PLD1     | NON_SYNONYMOUS    | Y/C | tAc/tGc | P1-L6: 86/22 P1-L7: 105/27   | P1-L6: 0.26 P1-L7: 0.26 |
| chr3 | 184801273 | G | T | SNP | C3orf70  | NON_SYNONYMOUS    | T/K | aCa/aAa | P1-L7: 121/28                | P1-L7: 0.23             |
| chr3 | 38739982  | G | T | SNP | SCN10A   | NON_SYNONYMOUS    | L/M | Ctg/Atg | P1-L5: 42/7                  | P1-L5: 0.17             |
| chr3 | 43596923  | A | C | SNP | ANO10    | NON_SYNONYMOUS    | F/L | ttT/ttG | P1-L3: 122/30                | P1-L3: 0.25             |
| chr3 | 52443586  | G | A | SNP | BAP1     | STOP_GAINED       | Q/* | Cag/Tag | P1-L3: 125/55                | P1-L3: 0.44             |
| chr3 | 58856032  | T | A | SNP | C3orf67  | NON_SYNONYMOUS    | Q/L | cAg/cTg | P1-L1: 16/5                  | P1-L1: 0.31             |
| chr3 | 64145731  | T | C | SNP | PRICKLE2 | NON_SYNONYMOUS    | D/G | gAt/gGt | P1-L1: 92/9                  | P1-L1: 0.1              |
| chr4 | 145628303 | A | G | SNP | HHIP     | NON_SYNONYMOUS    | R/G | Aga/Gga | P1-L6: 112/26 P1-L7: 249/167 | P1-L6: 0.23 P1-L7: 0.67 |
| chr4 | 7435159   | G | T | SNP | PSAPL1   | NON_SYNONYMOUS    | A/D | gCc/gAc | P1-L5: 44/11                 | P1-L5: 0.25             |

|      |           |   |   |     |           |                   |     |         |               |               |                         |
|------|-----------|---|---|-----|-----------|-------------------|-----|---------|---------------|---------------|-------------------------|
| chr4 | 8230207   | C | T | SNP | SH3TC1    | NON SYNONYMOUS    | A/V | gCc/gTc | P1-L7: 102/11 |               | P1-L7: 0.11             |
| chr5 | 112884661 | G | C | SNP | YTHDC2    | NON_SYNONYMOUS    | L/F | ttG/ttC | P1-L6: 63/11  | P1-L7: 127/50 | P1-L6: 0.17 P1-L7: 0.39 |
| chr5 | 140746016 | T | C | SNP | PCDHGA5   | NON SYNONYMOUS    | F/L | Ttc/Ctc | P1-L3: 63/17  |               | P1-L3: 0.27             |
| chr5 | 141025653 | C | A | SNP | FCHSD1    | SPLICE SITE DONOR |     |         | P1-L7: 48/6   |               | P1-L7: 0.13             |
| chr5 | 160114946 | G | A | SNP | ATP10B    | NON_SYNONYMOUS    | R/W | Cgg/Tgg | P1-L2: 56/14  |               | P1-L2: 0.25             |
| chr5 | 176764524 | C | T | SNP | LMAN9     | NON SYNONYMOUS    | R/H | cGc/cAc | P1-L8: 58/16  |               | P1-L8: 0.28             |
| chr5 | 23526741  | G | T | SNP | PRDM9     | NON SYNONYMOUS    | G/V | gGg/gTg | P1-L5: 62/9   |               | P1-L5: 0.15             |
| chr5 | 2753468   | C | T | SNP | C5orf38   | NON SYNONYMOUS    | R/C | Cgc/Tgc | P1-L2: 55/22  |               | P1-L2: 0.4              |
| chr5 | 40843786  | G | C | SNP | CARD6     | NON_SYNONYMOUS    | E/D | gaG/gaC | P1-L4: 119/17 |               | P1-L4: 0.14             |
| chr5 | 52216204  | C | T | SNP | ITGA1     | NON SYNONYMOUS    | S/L | tCa/tTa | P1-L3: 78/15  |               | P1-L3: 0.19             |
| chr6 | 106553065 | G | A | SNP | PRDM1     | NON SYNONYMOUS    | D/N | Gac/Aac | P1-L3: 105/15 |               | P1-L3: 0.14             |
| chr6 | 158454663 | G | A | SNP | SYNJ2     | NON_SYNONYMOUS    | R/H | cGt/cAt | P1-L1: 158/31 |               | P1-L1: 0.2              |
| chr6 | 26217559  | G | C | SNP | HIST1H2AE | NON SYNONYMOUS    | K/N | aaG/aaC | P1-L5: 57/13  |               | P1-L5: 0.23             |
| chr6 | 33284097  | C | A | SNP | ZBTB22    | NON SYNONYMOUS    | E/D | gaG/gaT | P1-L4: 103/20 |               | P1-L4: 0.19             |
| chr6 | 34495213  | C | A | SNP | PAC SIN1  | STOP_GAINED       | Y/* | taC/taA | P1-L7: 211/16 |               | P1-L7: 0.08             |
| chr6 | 34495214  | G | A | SNP | PAC SIN1  | NON SYNONYMOUS    | G/R | Ggg/Agg | P1-L7: 210/18 |               | P1-L7: 0.09             |
| chr6 | 37138304  | G | T | SNP | PIM1      | NON SYNONYMOUS    | G/C | Ggc/Tgc | P1-L1: 85/23  |               | P1-L1: 0.27             |
| chr6 | 42236076  | G | A | SNP | TRERF1    | NON SYNONYMOUS    | A/V | gCc/gTc | P1-L8: 98/27  |               | P1-L8: 0.28             |
| chr6 | 47686149  | G | A | SNP | GPR115    | NON_SYNONYMOUS    | G/R | Gga/Aga | P1-L7: 41/6   |               | P1-L7: 0.15             |
| chr6 | 55925700  | C | A | SNP | COL21A1   | NON SYNONYMOUS    | D/Y | Gat/Tat | P1-L4: 74/11  |               | P1-L4: 0.15             |
| chr6 | 65300295  | T | C | SNP | EYS       | NON SYNONYMOUS    | D/G | gAt/gGt | P1-L1: 47/14  |               | P1-L1: 0.3              |
| chr6 | 97620981  | T | C | SNP | MMS22L    | NON_SYNONYMOUS    | K/E | Aaa/Gaa | P1-L8: 26/8   |               | P1-L8: 0.31             |
| chr7 | 101259501 | C | A | SNP | MYL10     | NON SYNONYMOUS    | V/F | Gtc/Ttc | P1-L8: 71/19  |               | P1-L8: 0.27             |
| chr7 | 102524659 | A | G | SNP | FBXL13    | SPLICE SITE DONOR |     |         | P1-L2: 68/10  |               | P1-L2: 0.15             |
| chr7 | 103230256 | T | C | SNP | RELN      | NON SYNONYMOUS    | N/S | aAt/aGt | P1-L5: 73/15  |               | P1-L5: 0.21             |
| chr7 | 134936599 | G | T | SNP | STRA8     | NON_SYNONYMOUS    | V/F | Gtt/Ttt | P1-L7: 91/10  |               | P1-L7: 0.11             |
| chr7 | 138593803 | T | A | SNP | KIAA1549  | NON SYNONYMOUS    | K/N | aaA/aaT | P1-L5: 46/11  |               | P1-L5: 0.24             |
| chr7 | 27224373  | C | A | SNP | HOXA11    | NON SYNONYMOUS    | G/C | Ggc/Tgc | P1-L4: 110/13 |               | P1-L4: 0.12             |
| chr7 | 55259515  | T | G | SNP | EGFR      | NON SYNONYMOUS    | L/R | cTg/cGg | P1-L2: 58/20  | P1-L4: 144/31 | P1-L2: 0.34 P1-L4: 0.22 |
|      |           |   |   |     |           |                   |     |         | P1-L6: 37/16  | P1-7: 184/66  | P1-L6: 0.43 P1-7: 0.36  |
| chr7 | 70249991  | C | T | SNP | AUTS2     | NON SYNONYMOUS    | P/L | cCt/cTt | P1-L8: 58/9   |               | P1-L8: 0.16             |
| chr7 | 92123680  | G | A | SNP | PEX1      | NON SYNONYMOUS    | P/L | cCt/cTt | P1-L2: 59/16  |               | P1-L2: 0.27             |
| chr8 | 133899649 | G | A | SNP | TG        | NON_SYNONYMOUS    | A/T | Gct/Act | P1-L3: 71/29  |               | P1-L3: 0.41             |
| chr8 | 54764577  | C | T | SNP | RGS20     | STOP_GAINED       | Q/* | Caa/Taa | P1-L2: 48/9   |               | P1-L2: 0.19             |
| chr9 | 117169162 | C | G | SNP | DFNB31    | NON SYNONYMOUS    | R/T | aGa/aCa | P1-L4: 110/18 |               | P1-L4: 0.16             |
| chr9 | 126137569 | G | A | SNP | CRB2      | NON SYNONYMOUS    | V/M | Gtg/Atg | P1-L1: 62/14  |               | P1-L1: 0.23             |

|       |           |                 |   |     |            |                |           |                   |                             |                         |
|-------|-----------|-----------------|---|-----|------------|----------------|-----------|-------------------|-----------------------------|-------------------------|
| chr9  | 137711990 | G               | A | SNP | COL5A1     | NON SYNONYMOUS | G/D       | gGt/gAt           | P1-L4: 146/26               | P1-L4: 0.18             |
| chr9  | 34506648  | G               | A | SNP | DNAI1      | NON_SYNONYMOUS | G/S       | Ggc/Agc           | P1-L2: 52/8                 | P1-L2: 0.15             |
| chr10 | 30318029  | G               | T | SNP | KIAA1462   | NON SYNONYMOUS | P/T       | Ccg/Acg           | P1-L3: 92/24                | P1-L3: 0.26             |
| chr10 | 30602674  | C               | G | SNP | MTPAP      | NON SYNONYMOUS | R/T       | aGa/aCa           | P1-L8: 118/38               | P1-L8: 0.32             |
| chr10 | 43325830  | G               | T | SNP | BMS1       | NON_SYNONYMOUS | R/M       | aGg/aTg           | P1-L2: 115/31               | P1-L2: 0.27             |
| chr10 | 43659372  | C               | T | SNP | CSGALNACT2 | STOP_GAINED    | R/*       | Cga/Tga           | P1-L4: 82/11                | P1-L4: 0.13             |
| chr10 | 63817009  | C               | T | SNP | ARID5B     | NON SYNONYMOUS | A/V       | gCa/gTa           | P1-L6: 44/4 P1-L7: 87/24    | P1-L6: 0.09 P1-L7: 0.28 |
| chr10 | 63850815  | G               | T | SNP | ARID5B     | NON SYNONYMOUS | E/D       | gaG/gaT           | P1-L4: 140/24               | P1-L4: 0.17             |
| chr10 | 63850816  | G               | T | SNP | ARID5B     | STOP_GAINED    | E/*       | Gag/Tag           | P1-L4: 140/24               | P1-L4: 0.17             |
| chr10 | 73548740  | A               | T | SNP | CDH23      | NON SYNONYMOUS | N/I       | aAc/aTc           | P1-L4: 106/21               | P1-L4: 0.2              |
| chr11 | 118774095 | G               | A | SNP | BCL9L      | NON SYNONYMOUS | P/L       | cCc/cTc           | P1-L3: 12/6                 | P1-L3: 0.5              |
| chr11 | 20982017  | A               | T | SNP | NELL1      | NON_SYNONYMOUS | N/I       | aAc/aTc           | P1-L4: 108/12               | P1-L4: 0.11             |
| chr11 | 30915796  | T               | A | SNP | DCDC5      | NON SYNONYMOUS | E/V       | gAg/gTg           | P1-L6: 15/3 P1-L7: 47/9     | P1-L6: 0.2 P1-L7: 0.19  |
| chr11 | 44104839  | T               | G | SNP | ACCS       | NON SYNONYMOUS | F/C       | tTc/tGc           | P1-L8: 153/52               | P1-L8: 0.34             |
| chr11 | 46388377  | C               | T | SNP | DGKZ       | NON_SYNONYMOUS | R/W       | Cgg/Tgg           | P1-L3: 15/5                 | P1-L3: 0.33             |
| chr11 | 48266753  | G               | T | SNP | OR4X2      | NON SYNONYMOUS | G/V       | gGg/gTg           | P1-L7: 92/32                | P1-L7: 0.35             |
| chr11 | 610992    | GGAGGTGAAGT     | * | DEL | PHRF1      | CODON DELETION | EEVKLAI   | gaggagggtgaagc    | P1-L5: 18/5                 | P1-L5: 0.28             |
|       |           | CTGGCCATCAAGCCC |   |     |            |                | KPFYQKR/E | tggccatcaagcccttc |                             |                         |
|       |           | TTCTACCAGAAGAG  |   |     |            |                |           | taccagaagagg/gag  |                             |                         |
| chr11 | 62343307  | C               | A | SNP | TUT1       | NON SYNONYMOUS | R/S       | agG/agT           | P1-L3: 87/15                | P1-L3: 0.17             |
| chr11 | 64137196  | C               | T | SNP | RPS6KA4    | NON SYNONYMOUS | P/L       | cCc/cTc           | P1-L4: 135/20               | P1-L4: 0.15             |
| chr11 | 76372057  | C               | G | SNP | LRRC32     | NON_SYNONYMOUS | E/Q       | Gag/Cag           | P1-L1: 100/14               | P1-L1: 0.14             |
| chr11 | 78565185  | C               | T | SNP | ODZ4       | NON SYNONYMOUS | E/K       | Gag/Aag           | P1-L1: 64/16                | P1-L1: 0.25             |
| chr11 | 89185060  | C               | A | SNP | NOX4       | STOP_GAINED    | G/*       | Gga/Tga           | P1-L4: 109/14               | P1-L4: 0.13             |
| chr12 | 49361734  | G               | A | SNP | WNT10B     | NON SYNONYMOUS | R/C       | Cgc/Tgc           | P1-L8: 24/8                 | P1-L8: 0.33             |
| chr12 | 57437769  | C               | G | SNP | MYO1A      | NON_SYNONYMOUS | G/R       | Ggg/Cgg           | P1-L8: 151/30               | P1-L8: 0.2              |
| chr12 | 6700747   | C               | T | SNP | CHD4       | NON SYNONYMOUS | M/I       | atG/atA           | P1-L3: 128/12               | P1-L3: 0.09             |
| chr12 | 67699889  | G               | T | SNP | CAND1      | NON SYNONYMOUS | G/V       | gGa/gTa           | P1-L6: 106/14 P1-L7: 150/23 | P1-L6: 0.13 P1-L7: 0.15 |
| chr13 | 103400055 | C               | A | SNP | CCDC168    | NON SYNONYMOUS | A/S       | Gcc/Tcc           | P1-L3: 127/19               | P1-L3: 0.15             |
| chr13 | 113803727 | G               | A | SNP | F10        | NON_SYNONYMOUS | V/I       | Gtc/Atc           | P1-L3: 39/16                | P1-L3: 0.41             |
| chr13 | 114112415 | G               | T | SNP | DCUN1D2    | NON SYNONYMOUS | P/T       | Ccc/Acc           | P1-L3: 47/10                | P1-L3: 0.21             |
| chr13 | 61141723  | G               | A | SNP | TDRD3      | NON SYNONYMOUS | R/Q       | cGa/cAa           | P1-L3: 177/40               | P1-L3: 0.23             |
| chr14 | 101348931 | C               | A | SNP | RTL1       | NON_SYNONYMOUS | G/V       | gGc/gTc           | P1-L5: 53/10                | P1-L5: 0.19             |
| chr14 | 20692611  | C               | A | SNP | OR11H6     | NON SYNONYMOUS | S/Y       | tCt/tAt           | P1-L4: 136/26               | P1-L4: 0.19             |
| chr14 | 30194865  | A               | C | SNP | PRKD1      | NON SYNONYMOUS | F/V       | Ttc/Gtc           | P1-L8: 168/50               | P1-L8: 0.3              |
| chr14 | 81297610  | C               | A | SNP | CEP128     | NON SYNONYMOUS | E/D       | gaG/gaT           | P1-L5: 108/25               | P1-L5: 0.23             |

|       |          |   |   |     |          |                |     |         |                            |                         |
|-------|----------|---|---|-----|----------|----------------|-----|---------|----------------------------|-------------------------|
| chr15 | 28361916 | T | A | SNP | HERC2    | NON_SYNONYMOUS | I/F | Atc/Ttc | P1-L8: 69/11               | P1-L8: 0.16             |
| chr15 | 48808484 | G | T | SNP | FBN1     | NON_SYNONYMOUS | P/H | cCc/cAc | P1-L5: 25/6                | P1-L5: 0.24             |
| chr15 | 52656852 | C | A | SNP | MYO5A    | NON_SYNONYMOUS | D/Y | Gac/Tac | P1-L8: 80/24               | P1-L8: 0.3              |
| chr15 | 65298473 | T | A | SNP | MTFMT    | NON_SYNONYMOUS | E/D | gaA/gaT | P1-L1: 91/10               | P1-L1: 0.11             |
| chr15 | 79585658 | A | T | SNP | ANKRD34C | NON_SYNONYMOUS | D/V | gAt/gTt | P1-L7: 94/24               | P1-L7: 0.26             |
| chr16 | 23113725 | G | T | SNP | USP31    | NON_SYNONYMOUS | D/E | gaC/gaA | P1-L4: 135/26              | P1-L4: 0.19             |
| chr16 | 75690304 | T | C | SNP | TERF2IP  | NON_SYNONYMOUS | V/A | gTt/gCt | P1-L3: 111/11              | P1-L3: 0.1              |
| chr16 | 85010769 | G | C | SNP | ZDHHC7   | NON_SYNONYMOUS | L/V | Ctt/Gtt | P1-L7: 118/12              | P1-L7: 0.1              |
| chr16 | 87435863 | T | C | SNP | MAP1LC3B | NON_SYNONYMOUS | M/T | aTg/aCg | P1-L1: 97/25               | P1-L1: 0.26             |
| chr16 | 87872401 | C | A | SNP | SLC7A5   | NON_SYNONYMOUS | G/V | gGc/gTc | P1-L6: 17/2 P1-7: 67/26    | P1-L6: 0.12 P1-7: 0.39  |
| chr16 | 9857962  | A | T | SNP | GRIN2A   | NON_SYNONYMOUS | F/I | Ttc/Atc | P1-L4: 108/22              | P1-L4: 0.2              |
| chr17 | 36487222 | C | G | SNP | GPR179   | NON_SYNONYMOUS | G/R | Ggc/Cgc | P1-L6: 19/7 P1-L7: 75/20   | P1-L6: 0.37 P1-L7: 0.27 |
| chr17 | 46607852 | G | T | SNP | HOXB1    | NON_SYNONYMOUS | P/T | Ccg/Acg | P1-L2: 41/8                | P1-L2: 0.2              |
| chr17 | 46670937 | A | T | SNP | HOXB5    | NON_SYNONYMOUS | D/E | gaT/gaA | P1-L8: 61/18               | P1-L8: 0.3              |
| chr17 | 62082697 | G | T | SNP | ICAM2    | NON_SYNONYMOUS | P/Q | cCa/cAa | P1-L5: 61/9                | P1-L5: 0.15             |
| chr17 | 72353292 | C | T | SNP | BTBD17   | NON_SYNONYMOUS | R/H | cGc/cAc | P1-L7: 157/15              | P1-L7: 0.1              |
| chr17 | 72862646 | A | T | SNP | FDXR     | STOP_GAINED    | C/* | tgT/tgA | P1-L1: 119/13              | P1-L1: 0.11             |
| chr17 | 78968856 | G | A | SNP | CHMP6    | NON_SYNONYMOUS | E/K | Gag/Aag | P1-L4: 120/26              | P1-L4: 0.22             |
| chr18 | 13826517 | G | T | SNP | MC5R     | NON_SYNONYMOUS | W/C | tgG/tgT | P1-L5: 40/11               | P1-L5: 0.28             |
| chr18 | 19752022 | G | T | SNP | GATA6    | NON_SYNONYMOUS | R/L | cGc/cTc | P1-L5: 12/4                | P1-L5: 0.33             |
| chr18 | 2795986  | A | G | SNP | SMCHD1   | NON_SYNONYMOUS | D/G | gAc/gGc | P1-L6: 50/4 P1-L7: 100/19  | P1-L6: 0.08 P1-L7: 0.19 |
| chr18 | 55103988 | A | G | SNP | ONECUT2  | NON_SYNONYMOUS | K/R | aAg/aGg | P1-L6: 38/4 P1-L7: 147/21  | P1-L6: 0.11 P1-L7: 0.14 |
| chr18 | 63547745 | G | T | SNP | CDH7     | NON_SYNONYMOUS | G/V | gGg/gTg | P1-L4: 154/27              | P1-L4: 0.18             |
| chr18 | 675374   | C | T | SNP | ENOSF1   | NON_SYNONYMOUS | E/K | Gag/Aag | P1-L7: 78/13               | P1-L7: 0.17             |
| chr19 | 10818273 | C | G | SNP | QTRT1    | NON_SYNONYMOUS | R/G | Cgg/Ggg | P1-L1: 49/12               | P1-L1: 0.24             |
| chr19 | 1251608  | G | A | SNP | MIDN     | NON_SYNONYMOUS | S/N | aGc/aAc | P1-L7: 133/17              | P1-L7: 0.13             |
| chr19 | 14705462 | C | A | SNP | CLEC17A  | NON_SYNONYMOUS | P/H | cCc/cAc | P1-L4: 138/23              | P1-L4: 0.17             |
| chr19 | 16902312 | C | T | SNP | NWD1     | NON_SYNONYMOUS | T/M | aCg/aTg | P1-L8: 75/18               | P1-L8: 0.24             |
| chr19 | 18507257 | C | T | SNP | LRRC25   | NON_SYNONYMOUS | G/R | Ggg/Agg | P1-L7: 96/14               | P1-L7: 0.15             |
| chr19 | 3977560  | C | A | SNP | EEF2     | NON_SYNONYMOUS | D/Y | Gac/Tac | P1-L1: 63/17               | P1-L1: 0.27             |
| chr19 | 42585414 | C | G | SNP | ZNF574   | NON_SYNONYMOUS | L/V | Ctg/Gtg | P1-L6: 31/5 P1-L7: 103/23  | P1-L6: 0.16 P1-L7: 0.22 |
| chr19 | 44341260 | G | A | SNP | ZNF283   | NON_SYNONYMOUS | C/Y | tGc/tAc | P1-L1: 98/17               | P1-L1: 0.17             |
| chr19 | 50912417 | A | G | SNP | POLD1    | NON_SYNONYMOUS | D/G | gAc/gGc | P1-L8: 125/23              | P1-L8: 0.18             |
| chr19 | 8171042  | C | A | SNP | FBN3     | NON_SYNONYMOUS | C/F | tGt/tTt | P1-L1: 111/15              | P1-L1: 0.14             |
| chr19 | 9046085  | G | T | SNP | MUC16    | NON_SYNONYMOUS | P/Q | cCa/cAa | P1-L5: 47/7                | P1-L5: 0.15             |
| chr19 | 9070753  | C | T | SNP | MUC16    | NON_SYNONYMOUS | V/I | Gtc/Atc | P1-L6: 75/17 P1-L7: 144/31 | P1-L6: 0.23 P1-L7: 0.22 |

|       |          |   |   |     |          |                |     |         |                           |                        |
|-------|----------|---|---|-----|----------|----------------|-----|---------|---------------------------|------------------------|
| chr20 | 1145710  | G | T | SNP | PSMF1    | NON_SYNONYMOUS | D/Y | Gac/Tac | P1-L4: 127/18             | P1-L4: 0.14            |
| chr20 | 13055085 | A | T | SNP | SPTLC3   | NON_SYNONYMOUS | T/S | Aca/Tca | P1-L1: 84/28              | P1-L1: 0.33            |
| chr20 | 34827893 | G | T | SNP | C20orf4  | NON_SYNONYMOUS | D/Y | Gac/Tac | P1-L8: 88/30              | P1-L8: 0.34            |
| chr20 | 36784458 | G | A | SNP | TGM2     | NON_SYNONYMOUS | A/V | gCc/gTc | P1-L3: 43/19              | P1-L3: 0.44            |
| chr20 | 4705360  | C | T | SNP | PRND     | NON_SYNONYMOUS | R/C | Cgc/Tgc | P1-L3: 102/19             | P1-L3: 0.19            |
| chr20 | 50255917 | T | C | SNP | ATP9A    | NON_SYNONYMOUS | T/A | Acc/Gcc | P1-L6: 69/7 P1-L7: 246/41 | P1-L6: 0.1 P1-L7: 0.17 |
| chr21 | 19685299 | G | T | SNP | TMPRSS15 | NON_SYNONYMOUS | Q/K | Cag/Aag | P1-L5: 79/12              | P1-L5: 0.15            |
| chr21 | 41452195 | G | A | SNP | DSCAM    | NON_SYNONYMOUS | S/F | tCc/tTc | P1-L4: 86/15              | P1-L4: 0.17            |
| chr21 | 45710810 | G | C | SNP | AIRE     | NON_SYNONYMOUS | G/R | Ggt/Cgt | P1-L5: 69/15              | P1-L5: 0.22            |
| chr21 | 47704827 | G | A | SNP | MCM3AP   | NON_SYNONYMOUS | S/F | tCt/tTt | P1-L4: 182/28             | P1-L4: 0.15            |
| chr21 | 47705145 | G | A | SNP | MCM3AP   | NON_SYNONYMOUS | S/F | tCt/tTt | P1-L4: 169/23             | P1-L4: 0.14            |
| chr22 | 22868784 | C | T | SNP | ZNF280A  | NON_SYNONYMOUS | E/K | Gaa/Aaa | P1-L8: 32/7               | P1-L8: 0.22            |
| chr22 | 26906229 | A | G | SNP | TFIP11   | NON_SYNONYMOUS | S/P | Tcc/Ccc | P1-L2: 52/9               | P1-L2: 0.17            |
| chr22 | 42461863 | C | A | SNP | NAGA     | NON_SYNONYMOUS | R/L | cGt/cTt | P1-L8: 156/29             | P1-L8: 0.19            |

**Patient 2**

| Chr   | Postion   | Wild<br>type | Mutant | Type | Gene<br>name | Effect         | Amino Acid<br>Old/New | Condon<br>Old/New | Samples with mutation<br>(Sample ID:Total<br>Coverage/Mutant Coverage) | Samples with mutation<br>(Sample ID:Allele Frequency) |
|-------|-----------|--------------|--------|------|--------------|----------------|-----------------------|-------------------|------------------------------------------------------------------------|-------------------------------------------------------|
| chrX  | 151336967 | G            | T      | SNP  | GABRA3       | SYNONYMOUS     | P/P                   | ccC/ccA           | P2-L4: 82/13                                                           | P2-L4: 0.16                                           |
| chrX  | 19017193  | A            | C      | SNP  | GPR64        | SYNONYMOUS     | T/T                   | acT/acG           | P2-L3: 110/16                                                          | P2-L3: 0.15                                           |
| chr1  | 60139787  | G            | A      | SNP  | FGGY         | SYNONYMOUS     | G/G                   | ggG/ggA           | P2-L5: 77/12                                                           | P2-L5: 0.16                                           |
| chr5  | 140774618 | A            | T      | SNP  | PCDHGA8      | SYNONYMOUS     | V/V                   | gtA/gtT           | P2-L3: 88/11                                                           | P2-L3: 0.13                                           |
| chr7  | 126410117 | G            | A      | SNP  | GRM8         | SYNONYMOUS     | L/L                   | Ctg/Ttg           | P2-L4: 56/9                                                            | P2-L4: 0.16                                           |
| chr7  | 18067403  | C            | T      | SNP  | PRPS1L1      | SYNONYMOUS     | T/T                   | acG/acA           | P2-L6: 56/9 P2-1: 98/14                                                | P2-L6: 0.16 P2-1: 0.14                                |
| chr7  | 53103637  | G            | T      | SNP  | POM121L12    | SYNONYMOUS     | R/R                   | cgG/cgT           | P2-L4: 58/14                                                           | P2-L4: 0.24                                           |
| chr8  | 23160859  | A            | G      | SNP  | LOXL2        | SYNONYMOUS     | N/N                   | aaT/aaC           | P2-L4: 109/16                                                          | P2-L4: 0.15                                           |
| chr9  | 79318543  | C            | T      | SNP  | PRUNE2       | SYNONYMOUS     | P/P                   | ccG/ccA           | P2-L4: 117/11                                                          | P2-L4: 0.09                                           |
| chr10 | 117059561 | A            | T      | SNP  | ATRNL1       | SYNONYMOUS     | V/V                   | gtA/gtT           | P2-L4: 71/9                                                            | P2-L4: 0.13                                           |
| chr10 | 21120128  | G            | A      | SNP  | NEBL         | SYNONYMOUS     | S/S                   | agC/agT           | P2-L4: 134/19                                                          | P2-L4: 0.14                                           |
| chr10 | 7618752   | G            | T      | SNP  | ITIH5        | SYNONYMOUS     | R/R                   | Cgg/Agg           | P2-L4: 122/11                                                          | P2-L4: 0.09                                           |
| chr11 | 30033149  | C            | A      | SNP  | KCNA4        | SYNONYMOUS     | L/L                   | ctG/ctT           | P2-L1: 119/23                                                          | P2-L1: 0.19                                           |
| chr11 | 66472719  | G            | A      | SNP  | SPTBN2       | SYNONYMOUS     | A/A                   | gcC/gcT           | P2-L6: 25/6 P2-L1: 31/5                                                | P2-L6: 0.24 P2-L1: 0.16                               |
| chr12 | 29449984  | C            | A      | SNP  | FAR2         | SYNONYMOUS     | T/T                   | acC/acA           | P2-L4: 65/9                                                            | P2-L4: 0.14                                           |
| chr13 | 108922453 | C            | T      | SNP  | TNFSF13B     | SYNONYMOUS     | A/A                   | gcC/gcT           | P2-L4: 51/7                                                            | P2-L4: 0.14                                           |
| chr13 | 111137257 | C            | A      | SNP  | COL4A2       | SYNONYMOUS     | R/R                   | Cga/Aga           | P2-L5: 39/5                                                            | P2-L5: 0.13                                           |
| chr14 | 20711433  | T            | A      | SNP  | OR11H4       | SYNONYMOUS     | I/I                   | atT/atA           | P2-L6:86/12 P2-L1: 192/47                                              | P2-L6: 0.14 P2-L1: 0.24                               |
| chr17 | 29622573  | T            | C      | SNP  | OMG          | SYNONYMOUS     | S/S                   | tcA/tcG           | P2-L6: 93/7 P2-L1: 203/41                                              | P2-L6: 0.08 P2-L1: 0.2                                |
| chr22 | 36716401  | G            | C      | SNP  | MYH9         | SYNONYMOUS     | L/L                   | ctC/ctG           | P2-L4: 81/11                                                           | P2-L4: 0.14                                           |
| chrX  | 108684701 | C            | A      | SNP  | GUCY2F       | NON_SYNONYMOUS | R/L                   | cGt/cTt           | P2-L2: 61/9                                                            | P2-L2: 0.15                                           |
| chrX  | 117043483 | C            | A      | SNP  | KLHL13       | NON_SYNONYMOUS | G/C                   | Ggc/Tgc           | P2-L2: 76/10                                                           | P2-L2: 0.13                                           |
| chrX  | 117043551 | C            | A      | SNP  | KLHL13       | NON_SYNONYMOUS | R/L                   | cGc/cTc           | P2-L6: 56/7 P2-L1: 130/17                                              | P2-L6: 0.13 P2-L1: 0.13                               |
| chrX  | 118230564 | T            | A      | SNP  | KIAA1210     | NON_SYNONYMOUS | I/F                   | Att/Ttt           | P2-L6: 65/5 P2-L1:80/10                                                | P2-L6: 0.08 P2-L1:0.13                                |
| chrX  | 35994029  | A            | T      | SNP  | KXorf22      | NON_SYNONYMOUS | K/N                   | aaA/aaT           | P2-L2: 113/29                                                          | P2-L2: 0.26                                           |
| chr1  | 215759855 | G            | T      | SNP  | KCTD3        | NON_SYNONYMOUS | G/V                   | gGa/gTa           | P2-L1: 105/13                                                          | P2-L1: 0.12                                           |
| chr1  | 43908554  | C            | T      | SNP  | SZT2         | NON_SYNONYMOUS | P/L                   | cCg/cTg           | P2-L4: 105/12                                                          | P2-L4: 0.11                                           |
| chr2  | 231865129 | C            | A      | SNP  | SPATA3       | NON_SYNONYMOUS | P/H                   | cCc/cAc           | P2-L2: 46/6                                                            | P2-L2: 0.13                                           |
| chr2  | 73799812  | A            | T      | SNP  | ALMS1        | NON_SYNONYMOUS | N/I                   | aAc/aTc           | P2-L4: 79/11                                                           | P2-L4: 0.14                                           |
| chr3  | 186980370 | C            | A      | SNP  | MASP1        | STOP GAINED    | E/*                   | Gag/Tag           | P2-L4: 99/13                                                           | P2-L4: 0.13                                           |
| chr3  | 47468651  | C            | T      | SNP  | SCAP         | NON_SYNONYMOUS | A/T                   | Gcc/Acc           | P2-L6: 29/4                                                            | P2-L6: 0.14                                           |

|       |           |   |   |     |                |                   |     |         |                           |                         |
|-------|-----------|---|---|-----|----------------|-------------------|-----|---------|---------------------------|-------------------------|
| chr3  | 58852348  | T | C | SNP | C3orf67        | NON SYNONYMOUS    | Q/R | cAa/cGa | P2-L3: 75/10              | P2-L3: 0.13             |
| chr4  | 165118644 | C | A | SNP | ANP32C         | NON_SYNONYMOUS    | G/W | Ggg/Tgg | P2-L4: 134/13             | P2-L4: 0.1              |
| chr4  | 55561888  | G | T | SNP | KIT            | NON SYNONYMOUS    | G/V | gGc/gTc | P2-L3: 133/16             | P2-L3: 0.12             |
| chr5  | 148747709 | A | T | SNP | PCYOX1L        | NON SYNONYMOUS    | Q/L | cAg/cTg | P2-L4: 185/18             | P2-L4: 0.1              |
| chr5  | 153406745 | A | T | SNP | FAM114A2       | NON_SYNONYMOUS    | S/R | agT/agA | P2-L4: 97/13              | P2-L4: 0.13             |
| chr5  | 167913508 | A | T | SNP | RARS           | NON SYNONYMOUS    | D/V | gAc/gTc | P2-L2: 80/12              | P2-L2: 0.15             |
| chr5  | 55195912  | G | T | SNP | IL31RA         | NON SYNONYMOUS    | G/W | Ggg/Tgg | P2-L4: 117/19             | P2-L4: 0.16             |
| chr6  | 129573414 | C | A | SNP | LAMA2          | STOP_GAINED       | Y/* | taC/taA | P2-L3: 93/16              | P2-L3: 0.17             |
| chr6  | 163148692 | A | T | SNP | PARK2          | SPLICE_SITE_DONOR |     |         | P2-L2: 56/9               | P2-L2: 0.16             |
| chr6  | 41898436  | A | T | SNP | BYSL           | NON SYNONYMOUS    | N/Y | Aac/Tac | P2-L1: 81/16              | P2-L1: 0.2              |
| chr6  | 7606308   | G | T | SNP | SNRNP48        | NON SYNONYMOUS    | G/V | gGt/gTt | P2-L4: 117/15             | P2-L4: 0.13             |
| chr7  | 100680783 | C | A | SNP | MUC17          | NON_SYNONYMOUS    | A/E | gCa/gAa | P2-L4: 171/18             | P2-L4: 0.11             |
| chr7  | 916310    | C | G | SNP | GET4           | NON SYNONYMOUS    | Q/E | Cag/Gag | P2-L1:48/9                | P2-L1: 0.19             |
| chr10 | 123976245 | G | T | SNP | TACC2          | NON SYNONYMOUS    | C/F | tGc/tTc | P2-L4: 103/29             | P2-L4: 0.28             |
| chr11 | 117278728 | G | T | SNP | CEP164         | STOP_GAINED       | E/* | Gag/Tag | P2-L4: 31/5               | P2-L4: 0.16             |
| chr12 | 12814659  | A | G | SNP | GPR19          | NON SYNONYMOUS    | F/L | Ttt/Ctt | P2-L1: 97/14              | P2-L1: 0.14             |
| chr12 | 12871200  | G | T | SNP | CDKN1B         | NON SYNONYMOUS    | G/W | Ggg/Tgg | P2-L6: 117/13 P2-1:151/22 | P2-L6: 0.11 P2-1:0.15   |
| chr12 | 25398284  | C | A | SNP | KRAS           | NON SYNONYMOUS    | G/V | gGt/gTt | P2-L3: 112/22             | P2-L3: 0.2              |
| chr12 | 50031265  | G | T | SNP | PRPF40B        | STOP_GAINED       | E/* | Gag/Tag | P2-L2: 113/16             | P2-L2: 0.14             |
| chr12 | 52710642  | C | A | SNP | KRT83          | SPLICE SITE DONOR |     |         | P2-L1: 73/23              | P2-L1: 0.32             |
| chr12 | 81733001  | G | A | SNP | PPFIA2         | NON SYNONYMOUS    | R/C | Cgt/Tgt | P2-L2: 65/7               | P2-L2: 0.11             |
| chr14 | 23417135  | T | A | SNP | HAUS4          | NON_SYNONYMOUS    | K/M | aAg/aTg | P2-L4: 144/14             | P2-L4: 0.1              |
| chr14 | 92403323  | C | A | SNP | FBLN5          | NON SYNONYMOUS    | G/V | gGa/gTa | P2-L4: 83/17              | P2-L4: 0.2              |
| chr14 | 94404124  | A | C | SNP | ASB2           | NON SYNONYMOUS    | V/G | gTg/gGg | P2-L4: 77/10              | P2-L4: 0.13             |
| chr15 | 90431823  | T | C | SNP | C15orf38-AP3S2 | NON SYNONYMOUS    | Y/C | tAt/tGt | P2-L3: 132/15             | P2-L3: 0.11             |
| chr16 | 18800347  | C | A | SNP | RPS15A         | NON_SYNONYMOUS    | C/F | tGc/tTc | P2-L4: 64/10              | P2-L4: 0.16             |
| chr16 | 19883702  | C | A | SNP | GPRC5B         | NON SYNONYMOUS    | G/C | Ggc/Tgc | P2-L3: 118/14             | P2-L3: 0.12             |
| chr16 | 2093682   | G | A | SNP | NTHL1          | NON SYNONYMOUS    | H/Y | Cac/Tac | P2-L3: 79/15              | P2-L3: 0.19             |
| chr16 | 2369832   | C | A | SNP | ABCA3          | NON SYNONYMOUS    | R/L | cGg/cTg | P2-L2: 74/11              | P2-L2: 0.15             |
| chr16 | 58568100  | T | A | SNP | CNOT1          | NON_SYNONYMOUS    | H/L | cAc/cTc | P2-L4: 60/9               | P2-L4: 0.15             |
| chr16 | 66918515  | G | C | SNP | PDP2           | NON SYNONYMOUS    | E/Q | Gag/Cag | P2-L4: 220/33             | P2-L4: 0.15             |
| chr17 | 61877909  | A | T | SNP | DDX42          | NON SYNONYMOUS    | S/C | Agt/Tgt | P2-L6: 65/8 P2-L1: 107/18 | P2-L6: 0.12 P2-L1: 0.17 |
| chr18 | 55833072  | A | T | SNP | NEDD4L         | NON_SYNONYMOUS    | K/I | aAa/aTa | P2-L4: 110/20             | P2-L4: 0.18             |
| chr19 | 38980905  | C | A | SNP | RYR1           | NON SYNONYMOUS    | P/T | Ccc/Acc | P2-L1: 65/15              | P2-L1: 0.23             |
| chr19 | 49303296  | C | A | SNP | BCAT2          | NON SYNONYMOUS    | W/L | tGg/tTg | P2-L4: 155/24             | P2-L4: 0.15             |
| chr19 | 50661552  | T | A | SNP | IZUM02         | STOP_GAINED       | K/* | Aag/Tag | P2-L3: 45/13              | P2-L3: 0.29             |



|       |          |   |   |     |       |                |     |         |              |             |
|-------|----------|---|---|-----|-------|----------------|-----|---------|--------------|-------------|
| chr19 | 5219404  | C | A | SNP | PTPRS | NON_SYNONYMOUS | E/D | gaG/gaT | P2-L2: 57/6  | P2-L2: 0.11 |
| chr20 | 58490574 | T | C | SNP | SYCP2 | NON_SYNONYMOUS | K/R | aAa/aGa | P2-L2: 60/11 | P2-L2: 0.18 |

---
